# Supplementary material
Source: Research Square preprint supplement (doi:10.21203/rs.3.rs-8812057/v1)
Supplement: Supplementary file 2 [file 9da19c5551426a66f696d556.docx]

**Target and pathway prediction workflow.** SMILES codes for ceramides identified by statistical analysis were compiled from the Human Metabolome Database (HMDB) and additional curated sources (see *SMILES Code – Ceramide.xlsx*) [1-5]. These SMILES were submitted to a ligand-based target prediction tool, SwissTargetPrediction, to infer putative protein targets based on chemical-similarity to known bioactive ligands. Predicted targets were then mapped to biological pathways using the STRING database to generate pathway-level hypotheses for downstream validation [6,7].

References:

1. [Wishart DS, Tzur D, Knox C, et al.,](http://www.ncbi.nlm.nih.gov/pubmed/34986597" \t "_blank)*[HMDB: the Human Metabolome Database.](http://www.ncbi.nlm.nih.gov/pubmed/34986597" \t "_blank)*[Nucleic Acids Res. 2007 Jan;35(Database issue):D521-6.](http://www.ncbi.nlm.nih.gov/pubmed/34986597" \t "_blank)[17202168](http://www.ncbi.nlm.nih.gov/pubmed/17202168)
2. Wishart DS, Knox C, Guo AC, et al., *HMDB: a knowledgebase for the human metabolome.* Nucleic Acids Res. 2009 37(Database issue):D603-610. [18953024](http://www.ncbi.nlm.nih.gov/pubmed/18953024)
3. Wishart DS, Jewison T, Guo AC, Wilson M, Knox C, et al., *HMDB 3.0 — The Human Metabolome Database in 2013.* Nucleic Acids Res. 2013. Jan 1;41(D1):D801-7. [23161693](http://www.ncbi.nlm.nih.gov/pubmed/23161693)
4. Wishart DS, Feunang YD, Marcu A, Guo AC, Liang K, et al., *HMDB 4.0 — The Human Metabolome Database for 2018.* Nucleic Acids Res. 2018. Jan 4;46(D1):D608-17. [29140435](http://www.ncbi.nlm.nih.gov/pubmed/29140435)
5. Wishart DS, Guo AC, Oler E, et al., *HMDB 5.0: the Human Metabolome Database for 2022.* Nucleic Acids Res. 2022. Jan 7;50(D1):D622–31. [34986597](http://www.ncbi.nlm.nih.gov/pubmed/34986597)
6. Daina, A., Michielin, O., and Zoete, V. (2019). [SwissTargetPrediction: updated data and new features for efficient prediction of protein targets of small molecules.](http://dx.doi.org/10.1093/nar/gkz382" \t "_blank) *Nucl. Acids Res. 47*(W1), W357-W364.
7. Szklarczyk D, Kirsch R, Koutrouli M, Nastou K, Mehryary F, Hachilif R, Gable AL, Fang T, Doncheva NT, Pyysalo S, Bork P, Jensen LJ, von Mering C. The STRING database in 2023: protein-protein association networks and functional enrichment analyses for any sequenced genome of interest. Nucleic Acids Res. 2023 Jan 6;51(D1):D638-D646. doi: 10.1093/nar/gkac1000. PMID: 36370105; PMCID: PMC9825434.
